# Supplementary material for: Super-Adsorbent Hydrogels for Removal of Methylene Blue from Aqueous Solution: Dye Adsorption Isotherms, Kinetics, and Thermodynamic Properties
Source: MDPI journal article supplement (doi:10.3390/macromol1040018), 2021-11-19
Supplement: s1 [file s1]

## Supplementary File

### NMR analysis to confirm $\pi$ - $\pi$ interactions, aromatic hydrophobic interactions:

Commercial samples of poly(NaSS),  $\bar{M}$ ~70,000 Da obtained from Sigma-Aldrich and poly(DMA),  $\bar{M}$ ~100,000 Da, obtained from Scientific Polymer Products, Inc. (Ontario, NY) were used for proton NMR analysis. Aromatic protons of MB are labelled as H<sub>1</sub>, H<sub>2</sub> and H<sub>3</sub>, which showed broadening of signals in the presence of aromatic polymer like poly(NaSS) whereas no peak broadening of signals observed in poly(DMA) solutions. Signal broadening confirmed the  $\pi$  -  $\pi$  interaction and delocalization of electron clouds as part of aromatic hydrophobic interactions between poly(NaSS) and MB. Signal broadening of MB proton signals was not observed for co-solutions of poly(DMA) and MB.

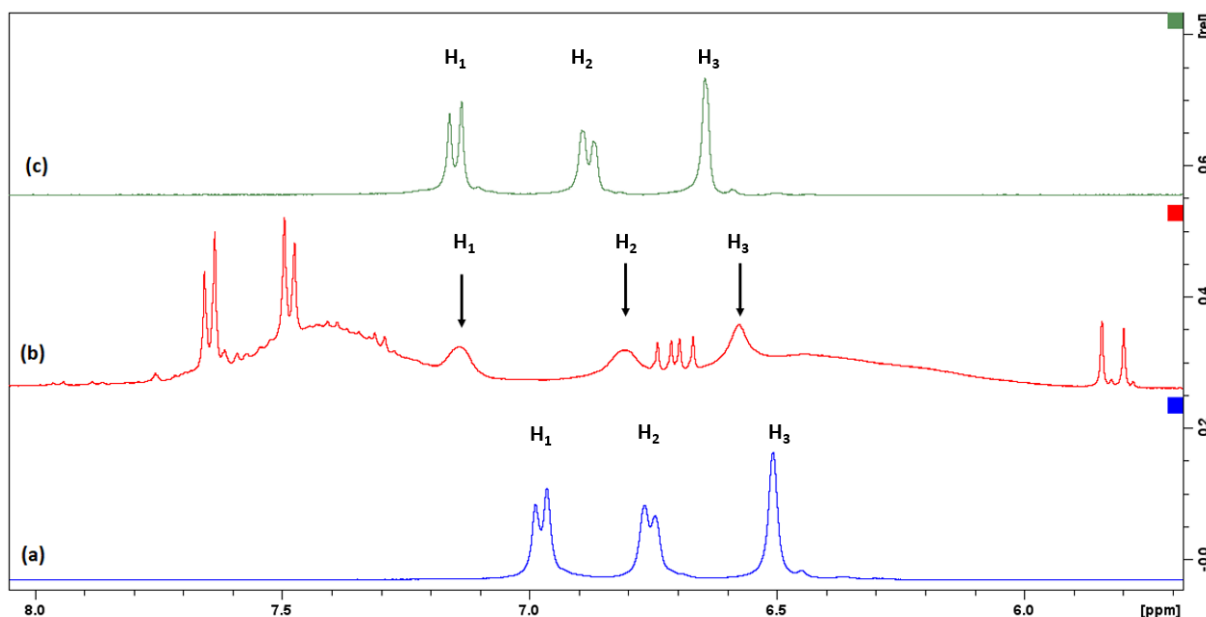

Figure S1- <sup>1</sup>H NMR spectra comparison for (a) 10<sup>-3</sup> M of MB solution in D<sub>2</sub>O, (b) 10<sup>-3</sup> M of MB in solution with 10<sup>-2</sup> M poly (NaSS) and (c) 10<sup>-3</sup> M of MB in solution with 10<sup>-2</sup> M poly (DMA)

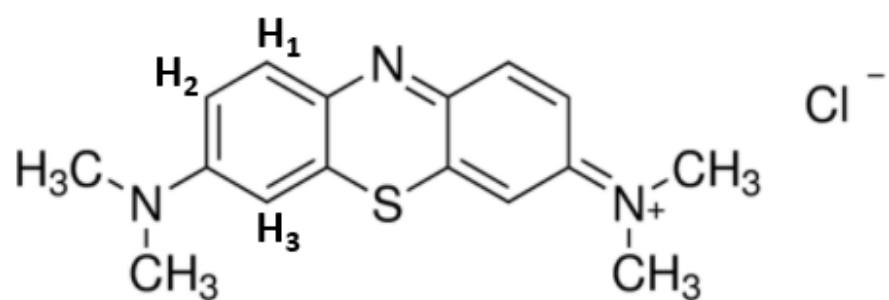

Figure S2 – Chemical structure of MB dye
